# Supplementary material
Source: Research Square preprint supplement (doi:10.21203/rs.3.rs-9879889/v1)
Supplement: Supplementary file 1 [file 2af5348f49f29301e9479f0e.docx]

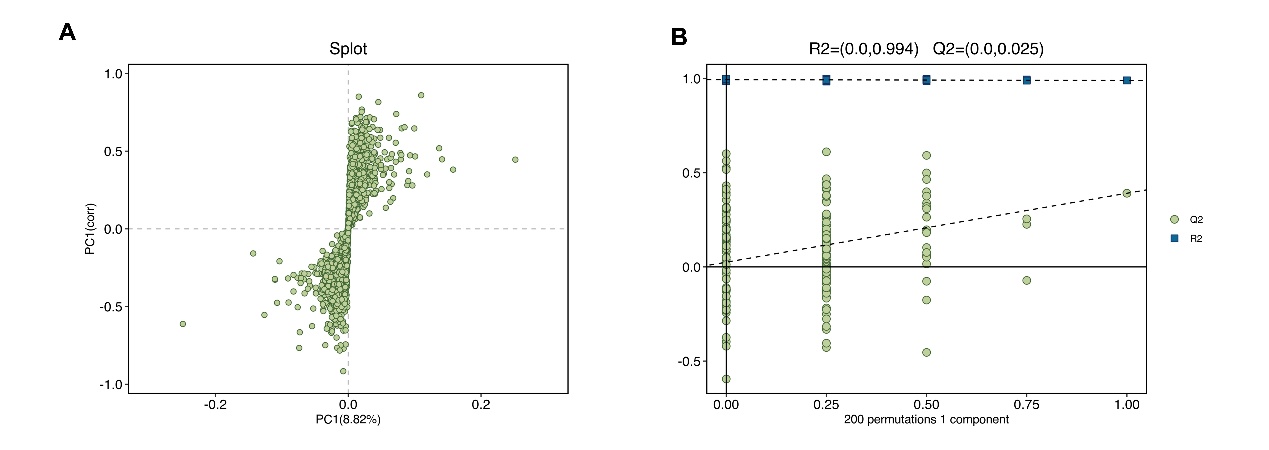


**Figure S1. Validation of the OPLS-DA model for fecal metabolomic analysis.**

(A) S-plot derived from the OPLS-DA model showing metabolites contributing to discrimination between control and PCOS groups; (B) Permutation test assessing the robustness of the OPLS-DA model.


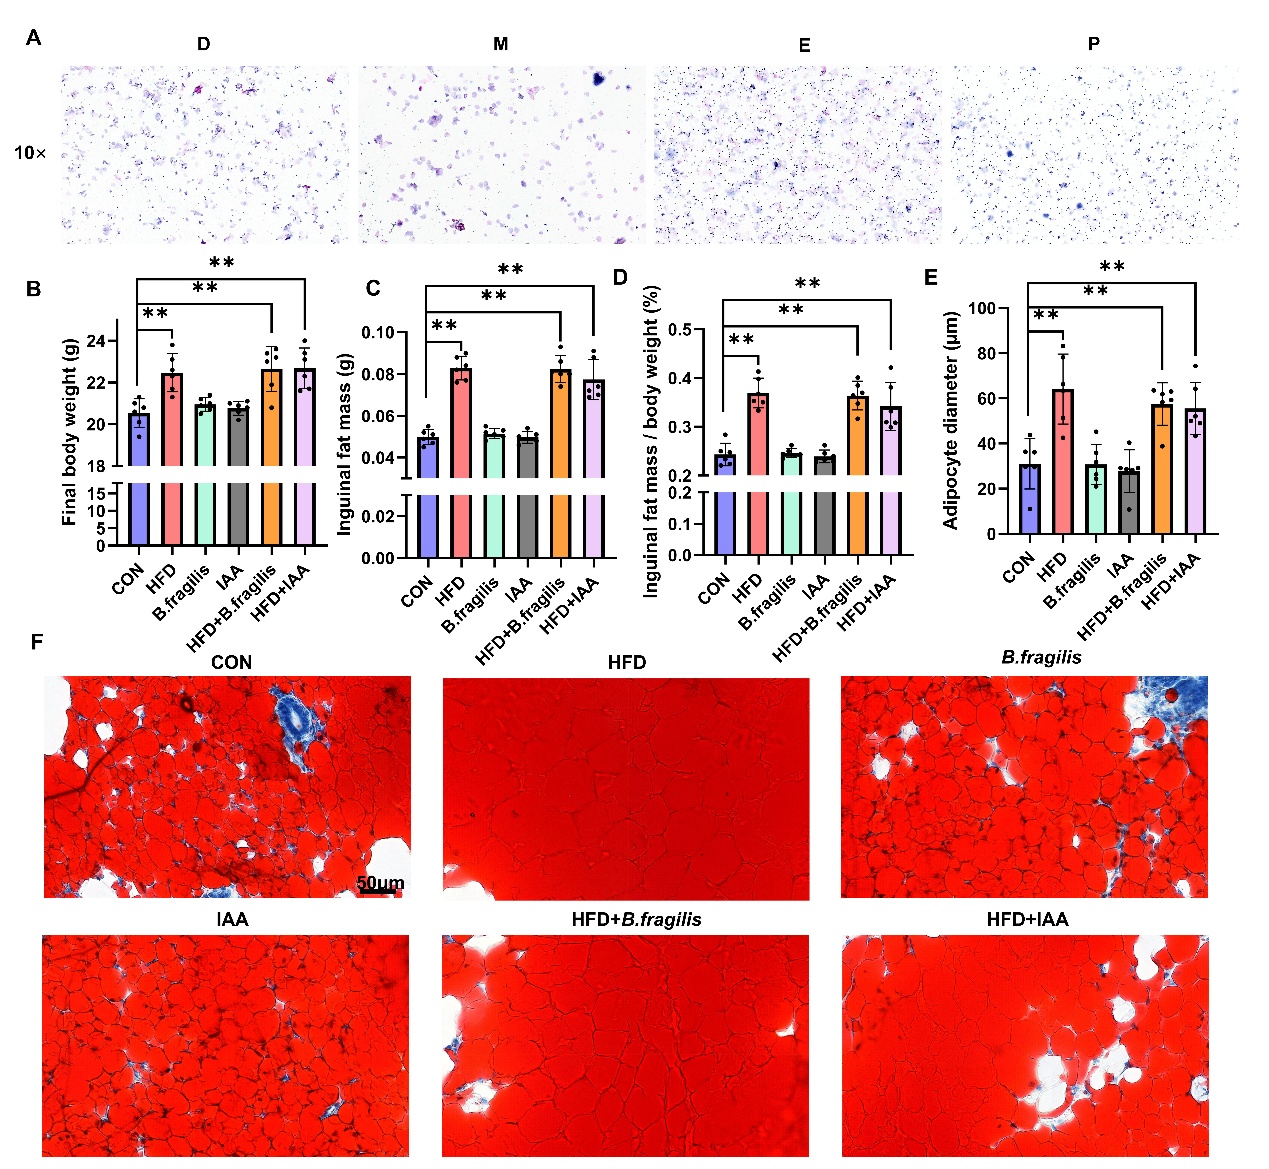


**Figure S2. Metabolic phenotypes induced by high-fat diet**

(A) Representative vaginal smear images; (B) Body weight; (C) Inguinal fat mass; (D) Fat-to-body weight ratio; (E) Adipocyte morphology; (F) Representative Oil Red O staining.


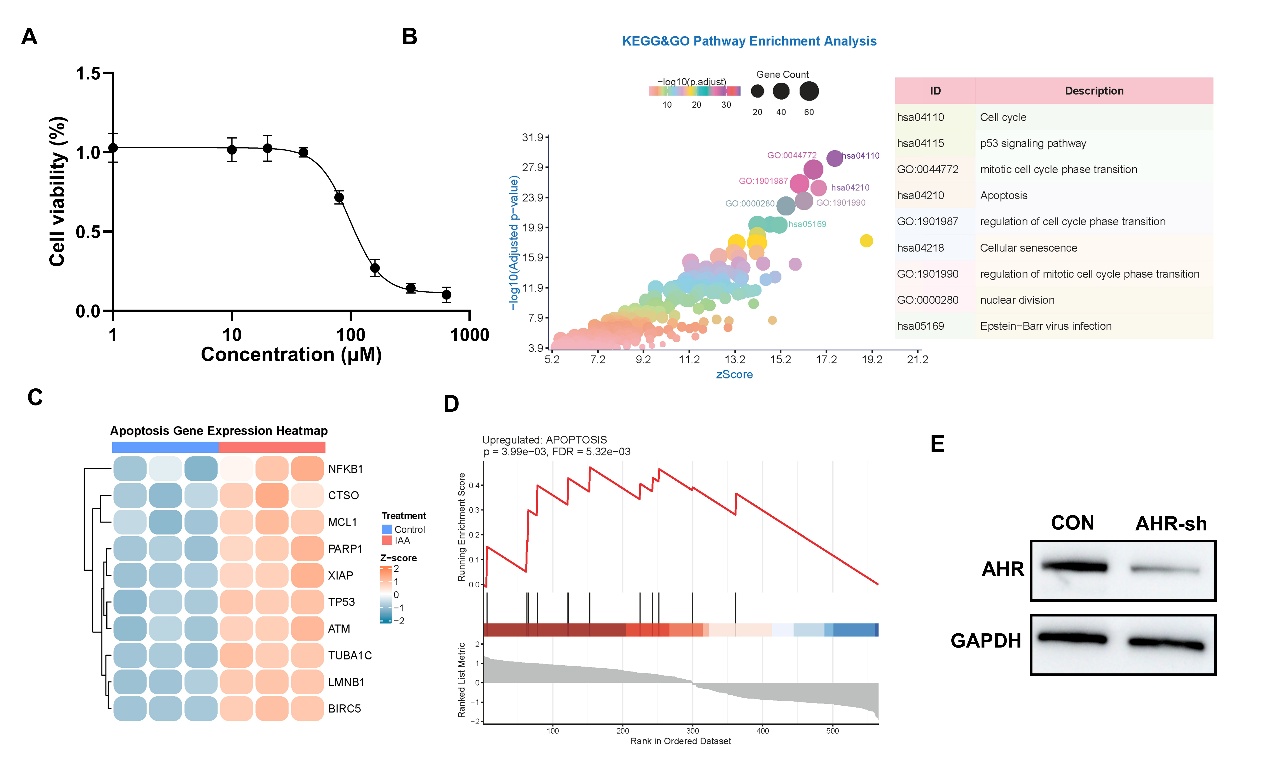
**Figure S3. Supplementary analysis following IAA treatment and validation of AHR knockdown**

(A) Cell viability of granulosa cells assessed by CCK8 assay under IAA treatment; (B) Supplementary pathway enrichment analysis; (C) Heatmap of apoptosis-related genes; (D) Gene set enrichment analysis (GSEA) of apoptosis-related pathways; (E) Validation of AHR knockdown efficiency.
